# Supplementary material
Source: MDPI journal article supplement (https://www.mdpi.com/search?q=nutrients-11-00815)
Supplement: s001 [file nutrients-11-00815-s001.pdf]

Table S1 – Comparisons between low- vs high-fibre intake groups

| Variable                                                        | Low-Fibre<br>(<21.5 g/day) n=24 | High-Fibre<br>(>21.5g/day) n=24 | p-value      |
|-----------------------------------------------------------------|---------------------------------|---------------------------------|--------------|
| Age (years)                                                     | 57.7±7.7                        | 55.6±11.0                       | 0.461        |
| Male %                                                          | 54.2                            | 70.8                            | 0.556        |
| MetS factors (>4) %                                             | 62.5                            | 75.0                            | 0.350        |
| Metabolic Syndrome z-score                                      | 4.8±2.6                         | 4.3±2.6                         | 0.549        |
| Body fat %                                                      | <b>41.3±6.7</b>                 | <b>37.1±7.0</b>                 | <b>0.024</b> |
| Average SBP (mmHg)                                              | 129.8±14.5                      | 134.7±14.0                      | 0.248        |
| Average DBP (mmHg)                                              | <b>81.4±7.3</b>                 | <b>87.2±10.5</b>                | <b>0.038</b> |
| Waist-to-hip ratio                                              | 0.92±0.1                        | 0.94±0.1                        | 0.771        |
| Mean OGTT glucose(mg/dl)                                        | <b>263.5±72.7</b>               | <b>185.3±63.0</b>               | <b>0.027</b> |
| Type 2 Diabetes %                                               | 41.7                            | 41.7                            | 1.000        |
| Aspirin use %                                                   | <b>33.3</b>                     | <b>8.3</b>                      | <b>0.033</b> |
| Never smoked %                                                  | <b>25.0</b>                     | <b>79.2</b>                     | <b>0.001</b> |
| Fibre intake (g/day)                                            | <b>16.1±3.0</b>                 | <b>28.9±7.7</b>                 | <b>0.001</b> |
| CHO intake (g/day)                                              | <b>164.3±53.1</b>               | <b>224.0±80.4</b>               | <b>0.004</b> |
| Energy (Kcal/day)                                               | 1847.7±737.8                    | 2163.1±550.8                    | 0.101        |
| Cardio-respiratory fitness<br>( $\dot{V}O_{2peak}$ – mL/kg/min) | 25.7±5.9                        | 29.9±7.1                        | 0.064        |
| IL-22 (pg/ml)                                                   | <b>69.0±106.4</b>               | <b>308.3±454.4</b>              | <b>0.019</b> |
| HsCRP (mg/l)                                                    | 2.7 ±2.5                        | 2.3±3.1                         | 0.716        |

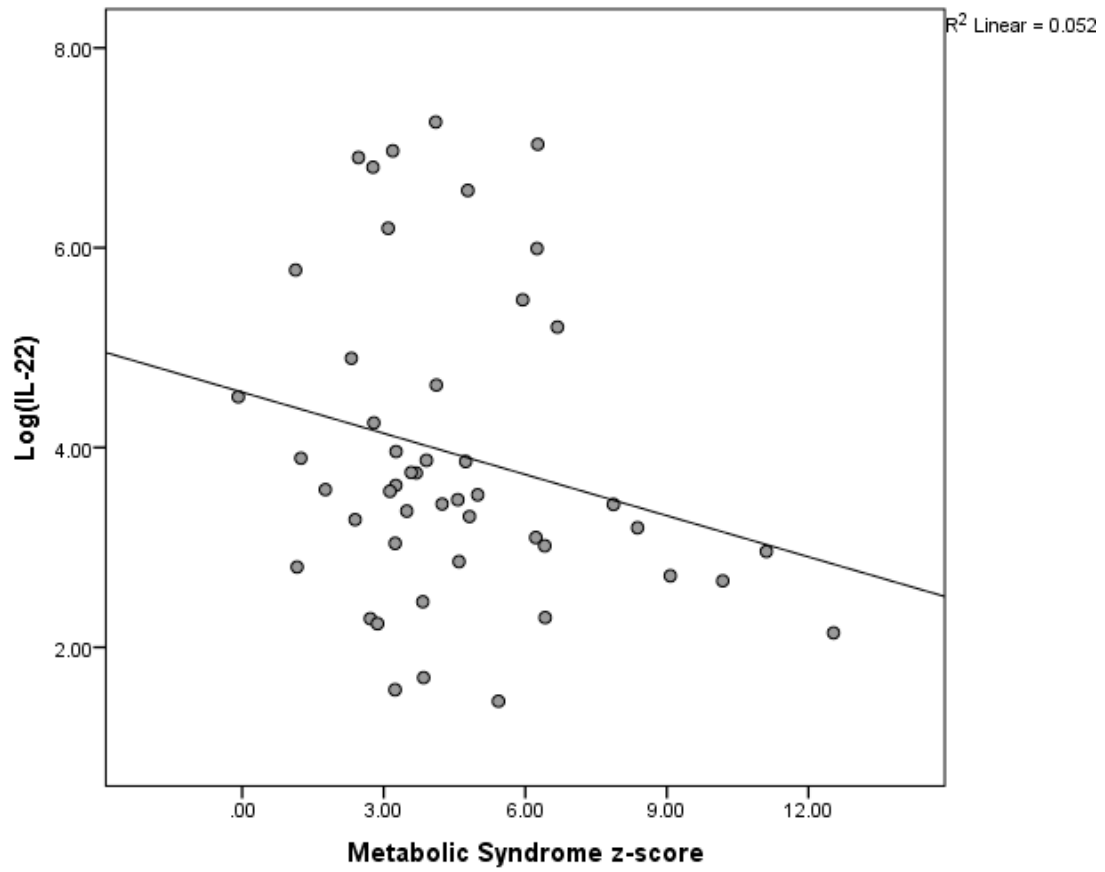

Figure S1. Bi-variate correlation between circulating IL-22 and Metabolic Syndrome z-score
